# Supplementary material for: Comparative Effectiveness of Behavioral Interventions on Quality of Life for Older Adults With Mild Cognitive Impairment: A Randomized Clinical Trial
Source: PubMed Central journal article supplement (PMC6537922; doi:10.1001/jamanetworkopen.2019.3016), 2019-05-17
Supplement: jamanetwopen-2-e193016-s002.pdf [file jamanetwopen-2-e193016-s002.pdf]

## Supplementary Online Content

Chandler MJ, Locke DE, Crook JE, et al. Comparative effectiveness of behavioral interventions on quality of life for older adults with mild cognitive impairment: a randomized clinical trial. *JAMA Netw Open*. 2019;2(5):e193016. doi:10.1001/jamanetworkopen.2019.3016

**eFigure.** Mean Changes in Quality of Life

**eTable 1.** Baseline Characteristics According to Length of Follow-up

**eTable 2.** Outcome Measures at Baseline by Study Group and Site

**eTable 3.** Summaries of Raw Changes in Outcome Measures from Baseline to 12 Months by Study Group and Site

This supplementary material has been provided by the authors to give readers additional information about their work.

eFigure. Mean Changes in Quality of Life

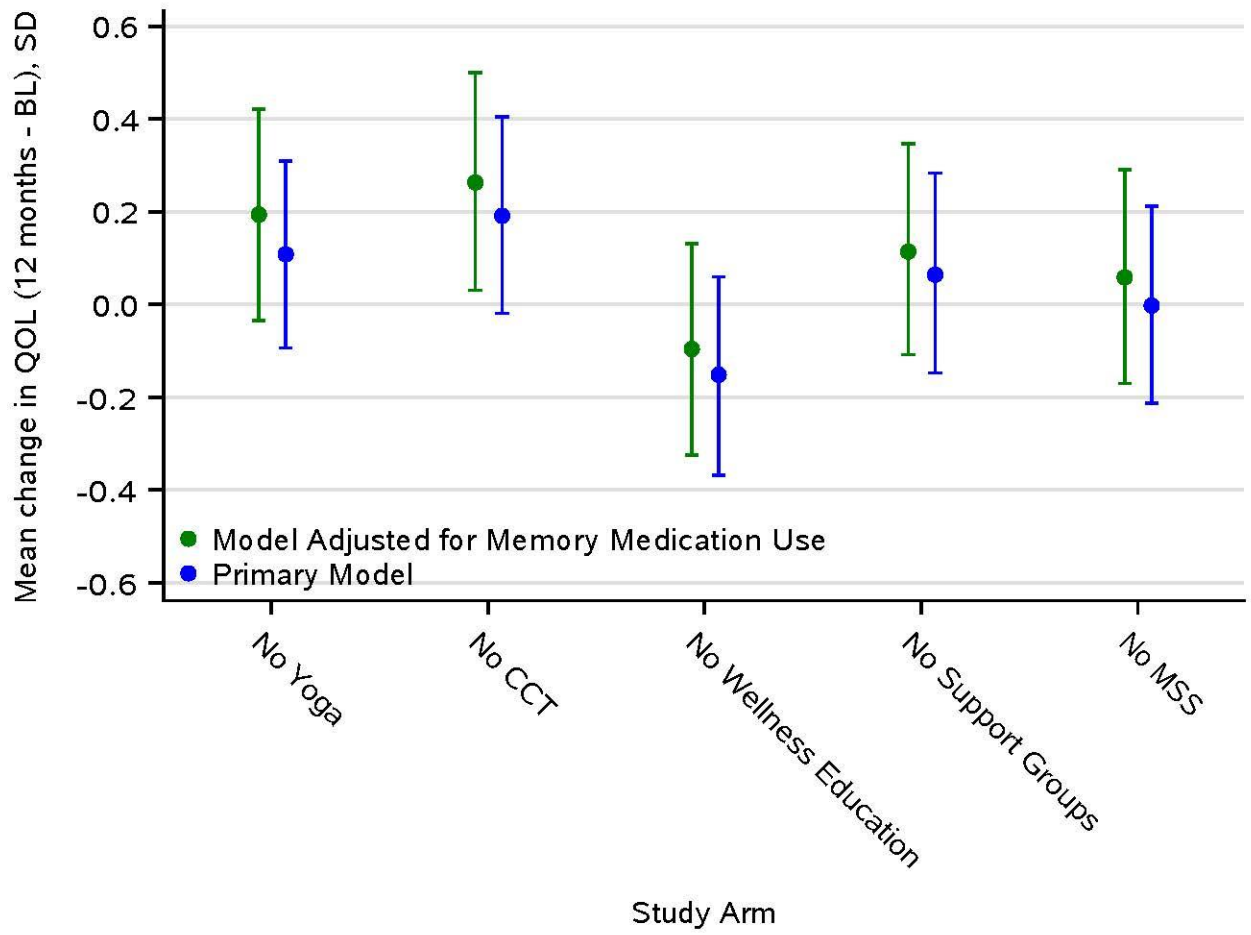

**eTable 1.** Baseline Characteristics According to Length of Follow-up

| <b>Characteristic</b>                        | <b>Less than 12 months follow-up (n=44)</b> | <b>12-18 months follow-up (n=228)</b> |
|----------------------------------------------|---------------------------------------------|---------------------------------------|
| Age, years                                   | n=44                                        | n=228                                 |
| Mean (SD)                                    | 77.4 (7.7)                                  | 74.7 (7.5)                            |
| Sex, No (%)                                  | n=44                                        | n=228                                 |
| Male                                         | 22 (50)                                     | 138 (61)                              |
| Female                                       | 22 (50)                                     | 90 (39)                               |
| Years of education                           | n=44                                        | n=227                                 |
| Median (range)                               | 16 (12-20)                                  | 16 (6-20)                             |
| Race, No (%)                                 | n=44                                        | n=228                                 |
| Non-white                                    | 2 (5)                                       | 10 (4)                                |
| White, non-Hispanic                          | 42 (95)                                     | 218 (96)                              |
| Marital status, No (%)                       | n=40                                        | n=228                                 |
| Married or marriage-like relationship        | 31 (78)                                     | 204 (89)                              |
| Divorced or separated                        | 2 (5)                                       | 7 (3)                                 |
| Widowed                                      | 6 (15)                                      | 14 (6)                                |
| Single and never married                     | 1 (3)                                       | 3 (1)                                 |
| Caregiver relationship to patient, No (%)    | n=40                                        | n=228                                 |
| Spouse or partner                            | 30 (75)                                     | 199 (87)                              |
| Son or daughter                              | 8 (20)                                      | 15 (7)                                |
| Brother or sister                            | 0 (0)                                       | 5 (2)                                 |
| Other family member                          | 0 (0)                                       | 2 (1)                                 |
| Friend                                       | 2 (5)                                       | 6 (3)                                 |
| Other                                        | 0 (0)                                       | 1 (0)                                 |
| Current memory medications, No (%)           | n=46                                        | n=228                                 |
| No                                           | 23 (64)                                     | 141 (62)                              |
| Yes                                          | 13 (36)                                     | 87 (38)                               |
| Dementia Rating Scale-2 total score          | n=41                                        | n=221                                 |
| Mean (SD)                                    | 127.8 (7.6)                                 | 129.5 (8.7)                           |
| Clinical Dementia Rating scale score, No (%) | n=44                                        | n=227                                 |
| 0=None                                       | 6 (14)                                      | 15 (7)                                |
| 0.5=Questionable                             | 38 (86)                                     | 212 (93)                              |
| Anxiety score                                | n=36                                        | n=226                                 |
| Mean (SD)                                    | 17.0 (5.7)                                  | 17.8 (5.2)                            |
| QOL- score                                   | n=37                                        | n=227                                 |
| Mean (SD)                                    | 40.0 (5.2)                                  | 40.4 (5.7)                            |
| Mood score                                   | n=37                                        | n=226                                 |
| Mean (SD)                                    | 12.8 (6.9)                                  | 11.8 (8.3)                            |
| Self-efficacy score                          | n=36                                        | n=227                                 |
| Mean (SD)                                    | 73.8 (13.9)                                 | 73.9 (14.0)                           |
| mADL score                                   | n=36                                        | n=227                                 |
| Mean (SD)                                    | 19.1 (5.6)                                  | 18.6 (4.8)                            |

Abbreviations: No, number; SD, standard deviation; QOL, Quality of Life; mADL, memory-related activities of daily living.

**eTable 2.** Outcome Measures at Baseline by Study Group and Site

| Outcome       | Site | No Yoga |             | No CCT |             | No Wellness Education |             | No Support Groups |             | No MSS |             |
|---------------|------|---------|-------------|--------|-------------|-----------------------|-------------|-------------------|-------------|--------|-------------|
|               |      | N       | Mean (SD)   | N      | Mean (SD)   | N                     | Mean (SD)   | N                 | Mean (SD)   | N      | Mean (SD)   |
| QOL           | MN   | 22      | 41.7 (4.8)  | 12     | 39.2 (6.1)  | 18                    | 39.1 (4.7)  | 17                | 41.2 (5.2)  | 19     | 40.5 (4.8)  |
|               | FL   | 13      | 40.6 (5.3)  | 9      | 40.0 (2.6)  | 8                     | 40.3 (4.0)  | 13                | 43.2 (5.1)  | 10     | 38.3 (5.2)  |
|               | AZ   | 14      | 35.8 (6.8)  | 20     | 42.3 (5.7)  | 15                    | 39.0 (6.2)  | 15                | 41.0 (4.3)  | 14     | 40.9 (5.0)  |
|               | WA   | 7       | 41.6 (5.7)  | 12     | 41.0 (6.8)  | 8                     | 38.4 (4.6)  | 8                 | 40.4 (9.5)  | 10     | 38.9 (7.5)  |
| Mood          | MN   | 22      | 11.1 (8.9)  | 12     | 16.3 (14.7) | 18                    | 13.2 (7.3)  | 17                | 9.2 (5.3)   | 19     | 12.4 (6.4)  |
|               | FL   | 13      | 9.5 (5.7)   | 9      | 14.6 (6.0)  | 8                     | 8.3 (4.7)   | 13                | 10.1 (9.0)  | 10     | 15.3 (5.7)  |
|               | AZ   | 13      | 14.1 (7.2)  | 20     | 9.4 (5.8)   | 15                    | 12.9 (10.2) | 15                | 11.9 (7.3)  | 14     | 10.8 (4.4)  |
|               | WA   | 7       | 11.6 (11.8) | 12     | 11.9 (10.0) | 8                     | 15.2 (10.3) | 8                 | 11.0 (8.2)  | 10     | 14.0 (10.5) |
| Self-Efficacy | MN   | 22      | 76.5 (13.7) | 12     | 66.0 (22.1) | 18                    | 75.8 (9.2)  | 17                | 74.5 (14.6) | 19     | 72.7 (16.0) |
|               | FL   | 13      | 73.8 (10.3) | 9      | 79.1 (9.7)  | 8                     | 73.3 (10.1) | 13                | 75.1 (16.6) | 10     | 72.8 (14.6) |
|               | AZ   | 14      | 70.3 (14.8) | 20     | 77.5 (12.9) | 15                    | 70.7 (15.4) | 14                | 77.8 (6.3)  | 14     | 75.5 (13.0) |
|               | WA   | 7       | 74.4 (12.5) | 12     | 72.8 (14.7) | 8                     | 70.8 (13.3) | 8                 | 74.9 (18.6) | 10     | 68.0 (18.1) |
| mADLs         | MN   | 22      | 18.9 (4.9)  | 12     | 19.2 (4.0)  | 17                    | 18.8 (5.4)  | 17                | 18.6 (4.3)  | 19     | 17.2 (4.4)  |
|               | FL   | 13      | 17.4 (4.0)  | 9      | 22.0 (6.5)  | 8                     | 18.0 (3.5)  | 13                | 18.7 (4.7)  | 10     | 19.8 (2.6)  |
|               | AZ   | 14      | 17.8 (5.5)  | 21     | 18.9 (5.9)  | 15                    | 16.5 (5.1)  | 15                | 18.4 (5.4)  | 14     | 20.9 (4.3)  |
|               | WA   | 7       | 18.4 (5.9)  | 12     | 17.5 (4.5)  | 8                     | 21.0 (3.9)  | 8                 | 20.6 (5.8)  | 10     | 18.6 (6.5)  |

Abbreviations: CCT, computerized cognitive training; MSS, memory support system; SD, standard deviation; QOL, Quality of Life; mADL, memory-related activities of daily living.

**eTable 3.** Summaries of Raw Changes in Outcome Measures from Baseline to 12 Months by Study Group and Site

| Outcome       | Site | No Yoga |             | No CCT |             | No Wellness Education |             | No Support Groups |             | No MSS |             |
|---------------|------|---------|-------------|--------|-------------|-----------------------|-------------|-------------------|-------------|--------|-------------|
|               |      | N       | Mean (SD)   | N      | Mean (SD)   | N                     | Mean (SD)   | N                 | Mean (SD)   | N      | Mean (SD)   |
| QOL           | MN   | 18      | -0.2 (3.4)  | 11     | 0.9 (2.4)   | 16                    | 0.5 (4.7)   | 15                | 0.2 (4.8)   | 16     | -0.5 (3.4)  |
|               | FL   | 12      | -0.3 (4.5)  | 5      | 3.0 (3.4)   | 7                     | -1.1 (3.7)  | 8                 | -0.6 (2.4)  | 8      | 3.0 (3.5)   |
|               | AZ   | 11      | 3.4 (3.5)   | 15     | -0.3 (3.6)  | 12                    | -0.5 (3.5)  | 12                | 1.0 (3.7)   | 11     | -1.9 (3.7)  |
|               | WA   | 7       | 2.3 (3.7)   | 12     | 0.8 (5.5)   | 8                     | -1.7 (7.1)  | 7                 | -0.6 (3.6)  | 8      | 1.2 (3.7)   |
| Mood          | MN   | 18      | -0.4 (6.9)  | 11     | -5.5 (11.2) | 16                    | 0.6 (5.3)   | 15                | 2.5 (6.2)   | 16     | 1.9 (5.1)   |
|               | FL   | 12      | 2.8 (6.9)   | 5      | -1.4 (3.8)  | 7                     | 5.2 (6.3)   | 7                 | -2.2 (4.5)  | 8      | -1.9 (7.8)  |
|               | AZ   | 10      | 2.8 (7.3)   | 15     | -0.6 (5.6)  | 12                    | 1.8 (9.2)   | 12                | -3.4 (7.1)  | 11     | 1.6 (7.4)   |
|               | WA   | 7       | -2.3 (11.6) | 12     | -0.1 (7.1)  | 8                     | 2.7 (8.2)   | 7                 | 0.6 (5.0)   | 8      | -1.5 (5.0)  |
| Self-Efficacy | MN   | 18      | 2.7 (10.7)  | 11     | 2.3 (11.5)  | 16                    | 1.0 (8.3)   | 15                | -7.3 (13.0) | 16     | 3.7 (9.1)   |
|               | FL   | 12      | -6.9 (16.5) | 5      | -0.8 (5.4)  | 7                     | -1.5 (11.2) | 8                 | 0.8 (8.3)   | 8      | 3.5 (8.9)   |
|               | AZ   | 11      | 0.9 (5.1)   | 15     | -0.2 (8.0)  | 12                    | 0.4 (9.8)   | 12                | -1.3 (10.9) | 11     | -2.2 (14.5) |
|               | WA   | 7       | -4.6 (15.6) | 12     | 4.1 (12.6)  | 8                     | -6.6 (20.5) | 7                 | -2.1 (17.7) | 8      | 0.6 (12.3)  |
| mADLs         | MN   | 18      | 2.1 (4.7)   | 11     | -0.1 (4.5)  | 15                    | 1.2 (4.6)   | 15                | 1.7 (3.1)   | 16     | 2.3 (4.5)   |
|               | FL   | 12      | 3.1 (5.2)   | 5      | -2.4 (4.4)  | 7                     | 2.3 (3.9)   | 8                 | -0.5 (0.9)  | 8      | 1.8 (4.1)   |
|               | AZ   | 11      | 2.5 (3.2)   | 16     | 1.6 (5.3)   | 12                    | 0.8 (4.8)   | 11                | 0.1 (3.1)   | 11     | 0.8 (2.9)   |
|               | WA   | 7       | 2.1 (1.9)   | 11     | 2.3 (2.5)   | 8                     | 1.9 (4.8)   | 7                 | -1.7 (3.7)  | 8      | -1.3 (7.8)  |

Abbreviations: CCT, computerized cognitive training; MSS, memory support system; SD, standard deviation; QOL, Quality of Life; mADL, memory-related activities of daily living.
